# Supplementary material for: Reference standards for body fat measures using GE dual energy x-ray absorptiometry in Caucasian adults
Source: PLOS journal article supplement (doi:10.1371/journal.pone.0175110), 2017-04-07
Supplement: S10 (10.1371/journal.pone.0175110.s010) [file journal.pone.0175110.s010]

**Figure S10. Trunk-to-leg %fat ratio vs. age in men**

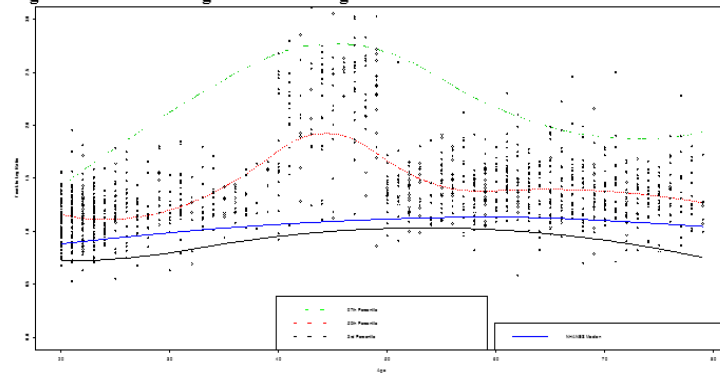

Solid black, red, and green lines indicate 3<sup>rd</sup>, 50<sup>th</sup>, and 97<sup>th</sup> percentiles  
Solid blue line indicates median value from NHANES cohort  
L (box cox function), M (mean), and S (coefficient of variation) values are 1.4, 1.3, and 30.7, respectively.
